# Supplementary material for: Comparison of the efficacy and safety of catheter-directed thrombolysis using different approaches in the treatment of deep venous thrombosis of the lower limbs
Source: Research Square preprint supplement (doi:10.21203/rs.3.rs-7473230/v1), 2025-09-09
Supplement: Supplementary file 1 [file 62ea6559d425189be68d40e8.pdf]

# **Comparison of the efficacy and safety of catheter-directed thrombolysis using different approaches in the treatment of deep venous thrombosis of the lower limbs**

Yuankai Luo, MM<sup>1,2,\*</sup>, Yong Li, MD<sup>2,3</sup>, Shaorui Zhang, BM<sup>4</sup>, Weiguo Xu, MD<sup>2</sup>, Jicai Ma MM<sup>5</sup>,  
Qingsong Wu, MD<sup>1,\*</sup>

<sup>1</sup> Hepatobiliary and Pancreatic Tumor Diagnosis and Treatment Center, Department of  
Hepatobiliary Surgery, Yuebei People's Hospital, Shaoguan, China

<sup>2</sup> Zhuhai Interventional Medical Centre, Zhuhai People's Hospital (Zhuhai Clinical Medical  
College of Jinan University), Zhuhai, China

<sup>3</sup> Zhuhai Institute of Translational Medicine, Guangdong Provincial Key Laboratory of Tumor  
Interventional Diagnosis and Treatment, Zhuhai People's Hospital (Zhuhai Clinical Medical  
College of Jinan University), Zhuhai, China

<sup>4</sup> Department of Ultrasound Medicine, Zhanjiang Central People's Hospital, Zhanjiang, China

<sup>5</sup> Department of Neurology, Yuebei People's Hospital, Shaoguan, China

## **\* Corresponding authors:**

Yuankai Luo, MM

Hepatobiliary and Pancreatic Tumor Diagnosis and Treatment Center, Department of

Hepatobiliary Surgery, Yuebei People's Hospital, Shaoguan, China

Zhuhai Interventional Medical Centre, Zhuhai People's Hospital (Zhuhai Clinical Medical

College of Jinan University), Zhuhai, China

Postal address: No. 133, Huimin South Road, Shaoguan 512026, China

Phone: +86-13058353630

Email: [sgwylyk@163.com](mailto:sgwylyk@163.com)

Qingsong Wu, MD

Hepatobiliary and Pancreatic Tumor Diagnosis and Treatment Center, Department of

Hepatobiliary Surgery, Yuebei People's Hospital, Shaoguan, China

Postal address: No. 133, Huimin South Road, Shaoguan 512026, China

Phone: +86-13826368658

Email: [13826368658@163.com](mailto:13826368658@163.com)

## **Electronic Supplementary Materials**

### **Supplementary Methods**

#### **CDT procedures**

The patients underwent procedures on an operating table with continuous electrocardiographic monitoring. Angiographic imaging via a contralateral femoral approach confirmed vena cava patency before placement of a vena cava filter to prevent thrombus migration. CDT was performed using antegrade and retrograde approaches [1].

In the antegrade approach, the catheter was placed in the direction of venous flow through the popliteal, peroneal, posterior tibial, anterior tibial, small saphenous, or great saphenous veins under ultrasound guidance. Based on thrombus involvement, the puncture point was chosen, usually in the prone position, and a 5F sheath was inserted. Segment-by-segment venography with a single-curved catheter delineated the thrombus extent, and a 30–50 cm thrombolytic catheter was positioned accordingly.

In the retrograde approach, the catheter was inserted into the vein of affected limbs with ultrasound-guided puncture of the contralateral femoral or internal jugular vein in the supine position. The subsequent steps mirrored those in the antegrade group.

Regardless of the approach, a continuous thrombolytic infusion was delivered via a micropump and an indwelling thrombolytic catheter. Balloon angioplasty or stent implantation was performed in patients with iliac vein compression.

Postoperative thrombolytic therapy involved urokinase intermittent infusion (250,000 IU every 8 h) via a micropump and an indwelling thrombolytic catheter. Anticoagulation included low-

molecular-weight heparin (100 IU/kg every 12 h), with INR and fibrinogen levels monitored daily. Dosing was adjusted based on fibrinogen levels: halved if <1.5 g/L and stopped if <1.0 g/L. Low-molecular-weight heparin was discontinued when the INR was >2 [2]. Daily lower-limb venography was used to assess thrombus clearance until the end of thrombolytic therapy.

### **Efficacy evaluation**

Multiple indicators were used to objectively compare the efficacy of different CDT approaches for lower-limb DVT. These indicators assess the impact of treatment on lower limb swelling, thrombolysis, and venous patency at the end of thrombolytic therapy, offering an in-depth understanding of treatment effectiveness.

### **Swelling rate of the thighs and calves**

Swelling was measured by comparing the limb circumference 15 cm above and 10 cm below the mid-patella in both legs. Preoperative differences between the affected and unaffected limbs served as baseline swelling. Treatment effectiveness was assessed based on the change in circumference before and after CDT. The swelling rate (circumference reduction rate) was calculated as follows:

$$\text{Swelling rate} = \frac{(\text{Pretreatment circumference} - \text{Posttreatment circumference})}{\text{Pretreatment circumference}} \times 100$$

### **Porter score and venous patency rate**

Lower-extremity veins were categorized into seven segments: the popliteal, distal superficial femoral, proximal superficial femoral, common femoral, external iliac, common iliac, and inferior vena cava. Each segment was scored as follows: 0 for complete patency, 1 for partial patency with segmental, non-occlusive thrombus, and 2 for occlusive thrombus [3]. The total venous patency score was the sum of all segments, with pre- and post-treatment differences calculated for comparative analyses. This assessment comprehensively quantifies lower-extremity vein patency to compare CDT approaches.

The venous patency rate was calculated as follows:

$$\text{Venous patency rate} = \frac{\text{Pretreatment venous patency score} - \text{Posttreatment venous patency score}}{\text{Pretreatment venous patency score}} \times 100$$

This indicator objectively measures venous patency improvement, which is critical for evaluating CDT efficacy.

### **Patency grading**

Different CDT approaches may affect thrombus clearance in different ways. Thrombus clearance was assessed using DSA and categorized into three grades based on contrast retention, symptom relief and signs in the affected limb, and thrombus clearance rate [4]:

Grade 3 indicated no significant contrast retention, complete symptom resolution, unblocked veins, and a clearance rate of >95%. Grade 2 was defined as minimal contrast retention, near-

complete symptom relief, and a clearance rate of 50–95%. Grade 1 reflected significant contrast retention, minimal symptom relief, and a clearance rate of <50% or only side branch opening.

## **PSM**

Propensity score matching (PSM) was applied to balance covariates between treatment groups, minimizing selection bias, and creating a setting similar to a randomized controlled trial (RCT). As a widely used statistical method in observational studies, PSM reduces confounding and improves treatment effect evaluation [5, 6]. The core principle is to match patients with similar baseline characteristics but different CDT approaches, thereby simulating random allocation effects.

Potential confounders were chosen based on clinical relevance and PSM principles [7–9], including patient age, sex, BMI, disease stage, classification [10], affected limb (left or right), preoperative thigh and calf circumference differences, and preoperative FIB levels. Propensity scores were calculated for each patient to represent the probability of receiving a specific CDT approach.

A 1:1 matching ratio was used to pair patients with similar propensity scores from the different treatment groups, ensuring no significant baseline differences. This approach controlled for confounding variables, making comparisons between CDT approaches more reliable for evaluating efficacy and safety outcomes.

**Supplementary Figures**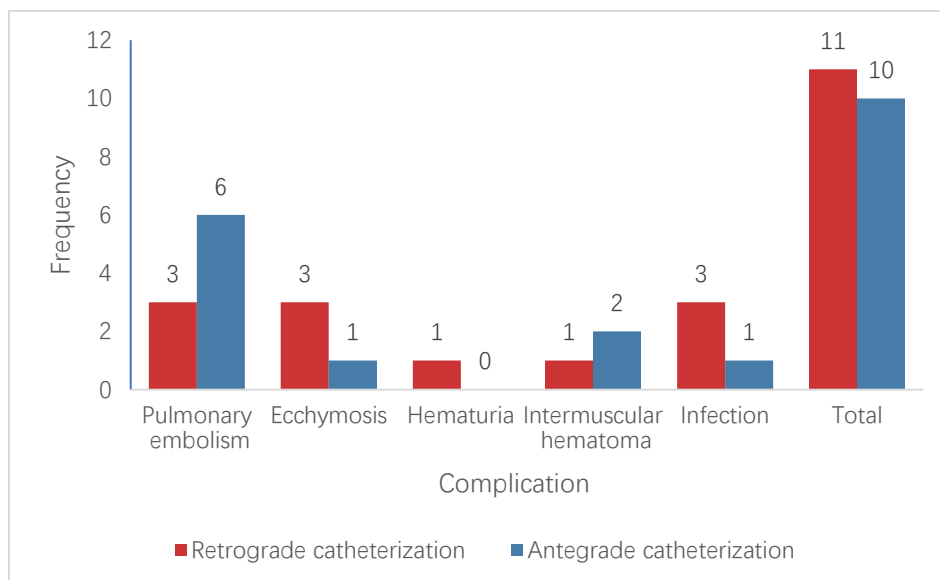

**ESM Fig. 1** Comparison of complication frequencies in patients who underwent retrograde and antegrade catheterization after PSM. Red bars represent retrograde catheterization, and blue bars represent antegrade catheterization

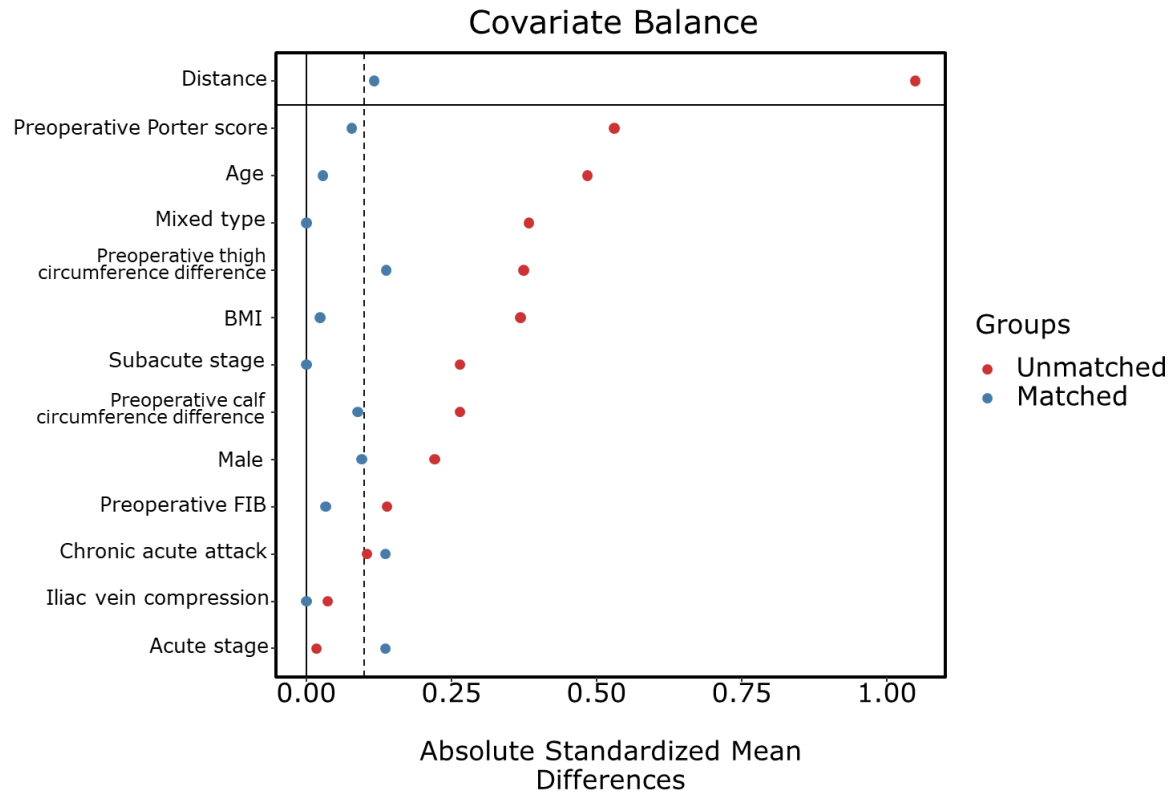

**ESM Fig. 2** Comparison of covariate balance before and after propensity score matching in the popliteal and infrapopliteal vein approach subgroups. Absolute SMDs are presented for each covariate, with red dots representing unmatched samples and blue dots representing matched samples. The vertical dashed line serves as a reference for assessing covariate balance



**ESM Table 1.** Baseline covariates before and after matching in the popliteal vein and infrapopliteal vein approach subgroups

| Variables                                              |                                      | Before Matching              |                         |                  | After Matching               |                         |                  |
|--------------------------------------------------------|--------------------------------------|------------------------------|-------------------------|------------------|------------------------------|-------------------------|------------------|
|                                                        |                                      | Infrapopliteal vein approach | Popliteal vein approach | SMD <sup>a</sup> | Infrapopliteal vein approach | Popliteal vein approach | SMD <sup>a</sup> |
| n                                                      |                                      | 47                           | 28                      |                  | 21                           | 21                      |                  |
| Age (years), Mean (SD)                                 |                                      | 56.45 (14.81)                | 61.29 (9.99)            | 0.484            | 60.90 (13.08)                | 60.62 (9.90)            | -<br>0.029       |
| BMI (kg/m <sup>2</sup> ), Mean (SD)                    |                                      | 24.03 (3.56)                 | 25.48 (3.95)            | 0.369            | 25.36 (4.07)                 | 25.27 (3.68)            | -<br>0.023       |
| Sex (%)                                                | Female                               | 20 (42.6)                    | 15 (53.6)               | 0.221            | 10 (47.6)                    | 9 (42.9)                | -<br>0.095       |
|                                                        | Male                                 | 27 (57.4)                    | 13 (46.4)               | -<br>0.221       | 11 (52.4)                    | 12 (57.1)               | 0.095            |
| Stage (%)                                              | Acute onset during the chronic stage | 5 (10.6)                     | 4 (14.3)                | 0.104            | 2 (9.5)                      | 3 (14.3)                | 0.136            |
|                                                        | Acute stage                          | 40 (85.1)                    | 24 (85.7)               | 0.017            | 19 (90.5)                    | 18 (85.7)               | -<br>0.136       |
|                                                        | Subacute stage                       | 2 (4.3)                      | 0 (0.0)                 | -<br>0.266       | 0 (0.0)                      | 0 (0.0)                 | 0.000            |
| Type (%)                                               | Central                              | 8 (17.0)                     | 2 (7.1)                 | -<br>0.384       | 2 (9.5)                      | 2 (9.5)                 | 0.000            |
|                                                        | Mixed                                | 39 (83.0)                    | 26 (92.9)               | 0.384            | 19 (90.5)                    | 19 (90.5)               | 0.000            |
| Preoperative thigh circumference difference, Mean (SD) |                                      | 3.21 (2.73)                  | 4.11 (2.39)             | 0.374            | 3.73 (2.02)                  | 4.06 (2.56)             | 0.137            |
| Preoperative calf circumference difference, Mean (SD)  |                                      | 2.67 (3.11)                  | 3.17 (1.89)             | 0.264            | 2.75 (3.96)                  | 2.92 (2.05)             | 0.088            |
| Preoperative Porter score, Mean (SD)                   |                                      | 6.17 (2.86)                  | 7.79 (3.05)             | 0.530            | 6.95 (2.85)                  | 7.19 (2.91)             | 0.078            |
| Preoperative FIB, Mean (SD)                            |                                      | 2.82 (1.05)                  | 2.69 (0.97)             | -<br>0.139       | 2.78 (0.93)                  | 2.81 (0.99)             | 0.033            |

<sup>a</sup>Standardized Mean Difference

FIB: Serum fibrinogen level

**ESM Table 2.** Comparison of post-procedure outcomes between the popliteal vein and infrapopliteal vein approaches after PSM

| <b>Antegrade catheterization</b> |                                    |                                                         |                                                    |                  |                     |
|----------------------------------|------------------------------------|---------------------------------------------------------|----------------------------------------------------|------------------|---------------------|
| <b>Characteristic</b>            | <b>Overall, N = 42<sup>a</sup></b> | <b>Infrapopliteal vein approach, N = 21<sup>a</sup></b> | <b>Popliteal vein approach, N = 21<sup>a</sup></b> | <b>Statistic</b> | <b>p-value</b>      |
| Hospitalization days             | 8.29 ± 2.63                        | 8.57 ± 2.99                                             | 8.00 ± 2.24                                        | 0.70             | 0.488 <sup>b</sup>  |
| Thigh swelling rate, (%)         | 4.9 ± 3.5                          | 4.9 ± 3.7                                               | 5.0 ± 3.5                                          | -0.09            | 0.932 <sup>b</sup>  |
| Calf swelling rate, (%)          | 4.1 (2.7, 7.3)                     | 5.8 (3.5, 7.5)                                          | 3.5 (1.3, 4.5)                                     | 308.50           | 0.028 <sup>c</sup>  |
| Postoperative Porter score       | 2.00 (0.25, 2.00)                  | 1.00 (0.00, 2.00)                                       | 2.00 (1.00, 2.00)                                  | 185.00           | 0.360 <sup>c</sup>  |
| Score differences                | 5.45 ± 2.92                        | 5.57 ± 3.16                                             | 5.33 ± 2.73                                        | 0.26             | 0.795 <sup>b</sup>  |
| Thrombolytic dose, kIU           | 205 (150, 258)                     | 225 (180, 320)                                          | 200 (130, 240)                                     | 271.00           | 0.207 <sup>c</sup>  |
| Days of thrombolysis             | 3.50 (2.25, 4.00)                  | 4.00 (2.00, 5.00)                                       | 3.00 (3.00, 4.00)                                  | 252.50           | 0.417 <sup>c</sup>  |
| Postoperative patency grading    |                                    |                                                         |                                                    |                  | 0.037 <sup>d</sup>  |
| Grade 2                          | 8 (25.00%)                         | 1 (6.25%)                                               | 7 (43.75%)                                         |                  |                     |
| Grade 3                          | 24 (75.00%)                        | 15 (93.75%)                                             | 9 (56.25%)                                         |                  |                     |
| Complication                     |                                    |                                                         |                                                    |                  | >0.999 <sup>d</sup> |
| No                               | 35 (83.33%)                        | 18 (85.71%)                                             | 17 (80.95%)                                        |                  |                     |
| Yes                              | 7 (16.67%)                         | 3 (14.29%)                                              | 4 (19.05%)                                         |                  |                     |

<sup>a</sup> Median (IQR); Mean ± SD; n (%)<sup>b</sup> Welch Two-Sample t-test<sup>c</sup> Wilcoxon rank sum test<sup>d</sup> Fisher's exact test

## References

1. Li X, Zhang F, Wang S (2017) Diagnosis and treatment guidelines for deep vein thrombosis. *Chin J Vasc Surg (Electron Educ)* 9:1–11
2. Kearon C, Akl EA, Comerota AJ, Prandoni P, Bounameaux H, Goldhaber SZ, Nelson ME, Wells PS, Gould MK, Dentali F, Crowther M, Kahn SR (2012) Antithrombotic therapy for VTE disease: Antithrombotic therapy and prevention of thrombosis, 9th ed: American college of chest physicians evidence-based clinical practice guidelines. *Chest* 141 (Supplement):e419S–e496S. <https://doi.org/10.1378/chest.11-2301>
3. Porter JM, Moneta GL (1995) Reporting standards in venous disease: An update. International Consensus Committee on Chronic Venous Disease. *J Vasc Surg* 21:635–645. [https://doi.org/10.1016/s0741-5214\(95\)70195-8](https://doi.org/10.1016/s0741-5214(95)70195-8)
4. Baekgaard N, Broholm R, Just S, Jørgensen M, Jensen LP (2010) Long-term results using catheter-directed thrombolysis in 103 lower limbs with acute iliofemoral venous thrombosis. *Eur J Vasc Endovasc Surg* 39:112–117. <https://doi.org/10.1016/j.ejvs.2009.09.015>
5. Chen JW, Maldonado DR, Kowalski BL, Miecznikowski KB, Kyin C, Gornbein JA, Domb BG (2022) Best practice guidelines for propensity score methods in medical research: Consideration on theory, implementation, and reporting. A review. *Arthroscopy* 38:632–642. <https://doi.org/10.1016/j.arthro.2021.06.037>
6. Kane LT, Fang T, Galetta MS, Goyal DKC, Nicholson KJ, Kepler CK, Vaccaro AR, Schroeder GD (2020) Propensity score matching: A statistical method. *Clin Spine Surg* 33:120–122. <https://doi.org/10.1097/BSD.0000000000000932>
7. Brookhart MA, Schneeweiss S, Rothman KJ, Glynn RJ, Avorn J, Stürmer T (2006) Variable selection for propensity score models. *Am J Epidemiol* 163:1149–1156.

<https://doi.org/10.1093/aje/kwj149>

8. Austin PC (2011) An introduction to propensity score methods for reducing the effects of confounding in observational studies. *Multivariate Behav Res* 46:399–424.  
<https://doi.org/10.1080/00273171.2011.568786>
9. Goldhaber SZ, Magnuson EA, Chinnakondapalli KM, Cohen DJ, Vedantham S (2021) Catheter-directed thrombolysis for deep vein thrombosis: 2021 update. *Vasc Med* 26:662–669.  
<https://doi.org/10.1177/1358863X211042930>
10. Hou Y, Liu Z (2016) Diagnostic and efficacy criteria for lower extremity deep vein thrombosis (Revised in 2015). *Chin J Surg Integr Trad West Med* 22:2
